# Supplementary material for: Allophone immigrant women’s knowledge and perceptions of epidural analgesia for labour pain: a qualitative study
Source: HighWire-hosted journal article supplement (doi:10.1136/bmjopen-2021-057125), 2022-04-01
Supplement: bmjopen-2021-057125supp003_data_supplement.pdf [file bmjopen-2021-057125supp003_data_supplement.pdf]

| CODE NAME                                                  | DESCRIPTION                                                                                                                                                                     | EXAMPLES                                                                                                                                                                                                                                                                 |
|------------------------------------------------------------|---------------------------------------------------------------------------------------------------------------------------------------------------------------------------------|--------------------------------------------------------------------------------------------------------------------------------------------------------------------------------------------------------------------------------------------------------------------------|
| <b>Positive effects of epidural</b>                        | Any talk from women that mentions positive or beneficial effects of the epidural                                                                                                | <i>After it was good because I didn't feel the pain anymore, the big pain. (Albanian)</i><br><br><i>My 4th child was born here, I also had an injection, an hour later the little one was born. (Dari)</i>                                                               |
| <b>Negative effects of epidural</b>                        | Any speech by women that mentions the negative effects or consequences of epidurals, either short or long term                                                                  | <i>I heard that if you move during the epidural, it can be harmful to your health. (Albanian)</i><br><br><i>Because I've heard that it causes back pain. (Dari)</i>                                                                                                      |
| <b>Help during childbirth (except epidural)</b>            | Any talk from women that mentions things other than the epidural that help them during childbirth (effect on fear, on pain, etc.)                                               | <i>If my husband is there, I will be less hurt and less afraid. (Albanian)</i><br><br><i>A week before the delivery, everything was explained to me (...) so I was not afraid. (Dari)</i>                                                                                |
| <b>Sources of information</b>                              | Any mention by the women of sources of information concerning the epidural and everything related to it (its consequences, its effects, etc.)                                   | <i>In my family, in fact there are quite a few who have had caesarean sections, with epidurals. (Albanian)</i><br><br><i>It's the doctor who knows if it has negative effects on the baby or on our health, the doctor would have told us. (Dari)</i>                    |
| <b>Procedural knowledge</b>                                | What women say they know about the procedural elements of epidural insertion and use                                                                                            | <i>From what I've seen, when you put the epidural in, it's in the bones, you feel the cold. (Albanian)</i><br><br><i>Once we gave her the injection lying down because sitting down is more difficult. Three years ago she had the epidural while lying down. (Dari)</i> |
| <b>Clear-cut discourse of pro- or anti-peridural women</b> | Discourse of women who in the focus group defend the epidural (I call them "pioneers"), rather "militant" content that is often in contradiction with the majority of the group | <i>I try to retain only the positive, everything that others say, I don't want to listen. (Albanian)</i><br><br><i>I'm very happy, but if I do it again, I'll do it again. (Dari)</i>                                                                                    |

|                                         |                                                                                                                 |                                                                                                                                                                            |
|-----------------------------------------|-----------------------------------------------------------------------------------------------------------------|----------------------------------------------------------------------------------------------------------------------------------------------------------------------------|
|                                         | OR discourse of women who are firmly opposed to the epidural                                                    |                                                                                                                                                                            |
| <b>Normativity of childbirth</b>        | Normative discourse around vaginal delivery with contractions that is useful or beneficial in any capacity      | <i>For normal deliveries, we don't give this. (Albanian)</i><br><br><i>Because he thought that (...) giving vaginal delivery was even beneficial for my health. (Dari)</i> |
| <b>Pain and suffering in childbirth</b> | Discourse around the pain and suffering present during childbirth                                               | <i>I gave birth in Afghanistan and suffered a lot (Dari)</i>                                                                                                               |
| <b>Trust in the medical profession</b>  | Women's discourse around trust (or not) in the medical profession and the emotions that come with it            | <i>It is the doctor who knows if it has negative effects on the baby or on our health, the doctor would have told us (Dari)</i>                                            |
| <b>Questions</b>                        | Questions that women ask about epidurals in the broad sense (procedure, effects, contraindication, etc.)        | <i>If I move, could I be paralyzed? (Albanian, double coded with "negative effects")</i><br><br><i>The epidural, the older you get, is there more risk? (Dari)</i>         |
| <b>Words for epidural position</b>      | Lexical field related to the woman's position during the epidural insertion specifically requested for the film | <i>Stay calm, sit quietly, don't move (Dari)</i>                                                                                                                           |

NB: original code list was done in French, this is an English translation by the authors of this manuscript
